# Supplementary material for: Die Kosten der präoperativen Anämie bei Hüftgelenkrevisionsoperationen
Source: Springer Nature journal article supplement (doi:10.1007/s00101-022-01211-x), 2022-11-15

Zusatzmaterial zum Beitrag „Die Kosten der präoperativen Anämie bei Hüftgelenksrevisionsoperationen“ von Vorderwülbecke G, Spies C, v. Heymann C et al. (2022) in *Die Anaesthesiologie*

Beitrag und Zusatzmaterial stehen Ihnen auf [www.springermedizin.de](http://www.springermedizin.de) zur Verfügung. Bitte geben Sie dort den Beitragstitel in die Suche ein.

### Kostendaten und Liegedauern in Abhängigkeit von präoperativer Anämie

|                                                    | gesamt             | keine Anämie       | Anämie             | p-Wert |
|----------------------------------------------------|--------------------|--------------------|--------------------|--------|
| <b>Alle Patienten</b>                              | <i>N=1187</i>      | <i>N=833</i>       | <i>N=354</i>       |        |
| Kosten [€]                                         | 9475 [7826;12858]  | 8948 [7501;11339]  | 12318 [9027;20044] | <0.001 |
| Erlös [€]                                          | 9853 [8514;12304]  | 9611 [8332;10719]  | 11788 [8992;16298] | <0.001 |
| Deckung [€]                                        | 68 [-2170;1926]    | 591 [-1441;2103]   | -1170 [-4467;1238] | <0.001 |
| Liegedauer [Tage]                                  | 11 [9;15]          | 11 [9;14]          | 15 [11;23]         | <0.001 |
| ITS-Dauer [Tage]                                   | 0 [0;8]            | 0 [0;4]            | 4 [0;21]           | <0.001 |
| <b>Perioperativ nicht transfundierte Patienten</b> | <i>N=622</i>       | <i>N=525</i>       | <i>N=97</i>        |        |
| Kosten [€]                                         | 8238 [7043;9797]   | 8152 [6942;9524]   | 9049 [7747;11425]  | <0.001 |
| Erlös [€]                                          | 9572 [8029;10109]  | 8992 [8002;10093]  | 9816 [8576;12546]  | <0.001 |
| Deckung [€]                                        | 1060 [-408;2356]   | 1098 [-333;2357]   | 520 [-922;2295]    | 0.142  |
| Liegedauer [Tage]                                  | 10 [9;12]          | 10 [9;12]          | 11 [9;14]          | <0.001 |
| ITS-Dauer [Tage]                                   | 0 [0;0]            | 0 [0;0]            | 0 [0;4]            | 0.010  |
| <b>Perioperativ transfundierte Patienten</b>       | <i>N=565</i>       | <i>N=308</i>       | <i>N=257</i>       |        |
| Kosten [€]                                         | 11934 [9332;18235] | 11005 [8996;14511] | 13978 [9949;22734] | <0.001 |
| Erlös [€]                                          | 10779 [8992;13939] | 9957 [8576;12700]  | 12304 [9850;16796] | <0.001 |
| Deckung [€]                                        | -1464 [-4407;639]  | -1056 [-3242;823]  | -2366 [-6631;283]  | <0.001 |
| Liegedauer [Tage]                                  | 14 [11;21]         | 13 [10;16]         | 16 [12;27]         | <0.001 |
| ITS-Dauer [Tage]                                   | 5 [0;19]           | 3 [0;15]           | 8 [0;29]           | <0.001 |

### Kostendaten und Liegedauern in Abhängigkeit von Transfusion insgesamt

|                                     | gesamt             | keine Transfusion | Transfusion        | p-Wert |
|-------------------------------------|--------------------|-------------------|--------------------|--------|
| <b>Alle Patienten</b>               | <i>N=1187</i>      | <i>N=559</i>      | <i>N=628</i>       |        |
| Kosten [€]                          | 9475 [7826;12858]  | 8147 [6937;9513]  | 11696 [9195;17476] | <0.001 |
| Erlös [€]                           | 9853 [8514;12304]  | 8992 [8015;10093] | 10779 [8921;13847] | <0.001 |
| Deckung [€]                         | 68 [-2170;1926]    | 1122 [-332;2372]  | -1225 [-4051;832]  | <0.001 |
| Liegedauer [Tage]                   | 11 [9;15]          | 10 [9;12]         | 14 [11;19]         | <0.001 |
| ITS-Dauer [Tage]                    | 0 [0;8]            | 0 [0;0]           | 5 [0;18]           | <0.001 |
| <b>Präoperativ anämie Patienten</b> | <i>N=354</i>       | <i>N=63</i>       | <i>N=291</i>       |        |
| Kosten [€]                          | 12318 [9027;20044] | 8829 [7307;10428] | 13513 [9618;21767] | <0.001 |
| Erlös [€]                           | 11788 [8992;16298] | 9572 [8502;11917] | 12120 [9813;16740] | <0.001 |
| Deckung [€]                         | -1170 [-4467;1238] | 516 [-908;2203]   | -1729 [-6026;724]  | <0.001 |
| Liegedauer [Tage]                   | 15 [11;23]         | 10 [9;14]         | 16 [12;25]         | <0.001 |

|                                           |                   |                   |                    |        |
|-------------------------------------------|-------------------|-------------------|--------------------|--------|
| ITS-Dauer [Tage]                          | 4 [0;21]          | 0 [0;0]           | 7 [0;26]           | <0.001 |
| <b>Präoperativ nicht-anämie Patienten</b> | <i>N</i> =833     | <i>N</i> =496     | <i>N</i> =337      |        |
| Kosten [€]                                | 8948 [7501;11339] | 8086 [6832;9406]  | 10905 [8948;14309] | <0.001 |
| Erlös [€]                                 | 9611 [8332;10719] | 8992 [8002;10093] | 10093 [8576;12700] | <0.001 |
| Deckung [€]                               | 591 [-1441;2103]  | 1196 [-233;2393]  | -1003 [-3240;935]  | <0.001 |
| Liegedauer [Tage]                         | 11 [9;14]         | 10 [9;12]         | 12 [10;16]         | <0.001 |
| ITS-Dauer [Tage]                          | 0 [0;4]           | 0 [0;0]           | 3 [0;14]           | <0.001 |

### Graphische Darstellung transfundierter Erythrozytenkonzentrat

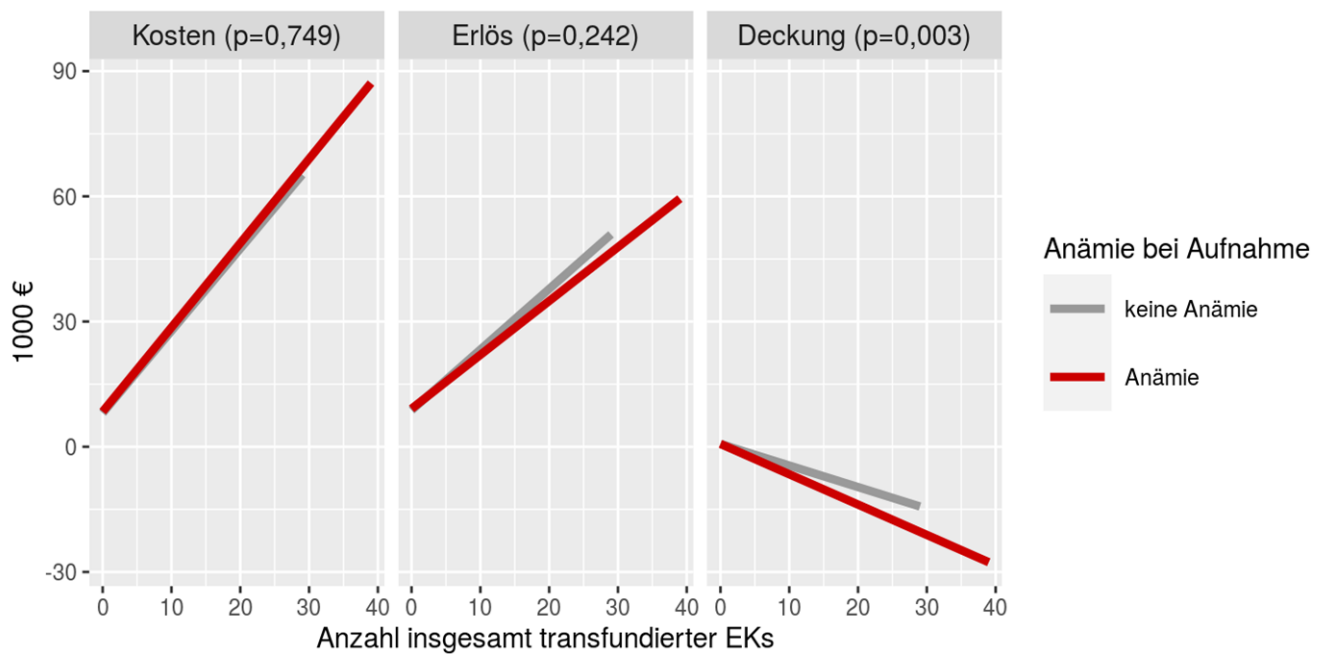

Supplement: MOESM1 [file 23713902]
